# Supplementary material
Source: HighWire-hosted journal article supplement (http://www.qdcxjkg.com/highwire/filestream/113422/field_highwire_adjunct_files/0/Supplementary_material.pdf)
Supplement: Supplementary_material.pdf [file Supplementary_material.pdf]

**Table S1: Prevalence of outcomes**

| <b>Outcome</b>                      | <b>Age 2</b> |     | <b>Age 3</b> |     | <b>Age 4</b> |     |
|-------------------------------------|--------------|-----|--------------|-----|--------------|-----|
|                                     | <i>N</i>     | (%) | <i>N</i>     | (%) | <i>N</i>     | (%) |
| <b>Wheeze</b>                       |              |     |              |     |              |     |
| Never                               | 1654         | 76  | 1660         | 76  | 1689         | 78  |
| 1- 3 times                          | 346          | 16  | 184          | 9   | 199          | 9   |
| ≥ 4 times                           | 174          | 8   | 329          | 15  | 286          | 13  |
| <b>Shortness of breath</b>          |              |     |              |     |              |     |
| Never                               | 1414         | 65  | 1618         | 75  | 1705         | 78  |
| 1- 3 times                          | 369          | 17  | 198          | 9   | 164          | 8   |
| ≥ 4 times                           | 390          | 18  | 357          | 16  | 304          | 14  |
| <b>Respiratory tract infections</b> |              |     |              |     |              |     |
| Never                               | 1097         | 50  | 1443         | 66  | 1409         | 65  |
| 1-2 times                           | 491          | 23  | 388          | 18  | 396          | 18  |
| ≥ 3 times                           | 586          | 27  | 342          | 16  | 367          | 17  |

**Table S2: Factor loadings of the food items in the “Health conscious” and “Western” dietary pattern in children aged 14 months ( $r > 0.2$ )**

| Food group                        | Mean intake<br>g/d | Factor loading                                                                 |                                                                       |
|-----------------------------------|--------------------|--------------------------------------------------------------------------------|-----------------------------------------------------------------------|
|                                   |                    | Health conscious<br>dietary pattern<br>Pearson’s<br>correlation<br>coefficient | Western dietary<br>pattern<br>Pearson’s<br>correlation<br>coefficient |
| Refined grains                    | 14.9               | -                                                                              | 0.57                                                                  |
| Whole grains                      | 61.9               | -                                                                              | -                                                                     |
| Starchy foods                     | 22.9               | 0.62                                                                           | -                                                                     |
| Dairy                             | 626.0              | -                                                                              | -                                                                     |
| Fruit                             | 162.2              | 0.32                                                                           | -                                                                     |
| Soy substitutes                   | 4.4                | -                                                                              | -                                                                     |
| Vegetables                        | 51.8               | 0.74                                                                           | -                                                                     |
| Potatoes                          | 34.0               | 0.61                                                                           | -                                                                     |
| Soups and sauces                  | 9.4                | -                                                                              | 0.23                                                                  |
| Savoury and snacks                | 3.9                | -                                                                              | 0.59                                                                  |
| Confectionary                     | 27.8               | -                                                                              | 0.72                                                                  |
| Vegetable oils                    | 0.56               | 0.50                                                                           | -                                                                     |
| Other fats                        | 10.6               | -                                                                              | 0.58                                                                  |
| Fish                              | 8.2                | 0.22                                                                           | -                                                                     |
| Shellfish                         | 0.30               | -                                                                              | -                                                                     |
| Meat                              | 25.5               | 0.21                                                                           | 0.27                                                                  |
| Eggs                              | 1.9                | -                                                                              | -                                                                     |
| Legumes                           | 4.0                | 0.59                                                                           | -                                                                     |
| Sugar containing<br>beverages     | 197.5              | -                                                                              | 0.59                                                                  |
| Non-sugar<br>containing beverages | 56.4               | -                                                                              | -                                                                     |
| Composite dishes                  | 102.3              | -                                                                              | -                                                                     |

|                           |      |     |
|---------------------------|------|-----|
| Eigen value*              | 3.4  | 1.7 |
| Variance explained<br>(%) | 16.3 | 8.2 |

---

|                            |             |             |
|----------------------------|-------------|-------------|
| <b>Total energy intake</b> | <b>0.36</b> | <b>0.54</b> |
|----------------------------|-------------|-------------|

---

PCA was used as an extraction method in which the Pearson's correlation coefficients represent the relative contribution of that food group to the identified dietary pattern.

\* The eigenvalue was used as indicator of the amount of variation explained by each dietary pattern.
